# Supplementary material for: Eolian chronology reveals causal links between tectonics, climate, and erg generation
Source: Research Square preprint supplement (doi:10.21203/rs.3.rs-801542/v1), 2021-09-11
Supplement: Supplementary file 1 [file 6540d81564da1fc0eade6d3d.xlsx]

## Sheet: S1 Description & summary
Type	Sample	Description	Latitude	Longitude	depth below surface (m)	Elevation	Weighted mean eolian residence time (myr)	±1σ	Apparent burial age (Ma) (Ri=5.56-5.79)	1σ+	1σ-	Apparent burial age (Ma) (Ri=6.75)	1σ+	1σ-	Apparent burial age (Ma) (Ri=4.17)	1σ+	1σ-
consolidated	PAN8	Eastern wall at Koppiekraal Pan. Sandstone	-26.9311	20.3463	20	850			1.74	0.15	0.15	2.12	0.14	0.15	1.17	0.16	0.15
	PAN7	Eastern wall at Koppiekraal Pan. Sandstone	-26.9311	20.3463	27.5	842.5			1.92	0.16	0.18	2.29	0.15	0.18	1.36	0.17	0.18
	PAN6	Eastern wall at Koppiekraal Pan. Sandstone	-26.9311	20.3463	30	840			2.14	0.16	0.16	2.5	0.16	0.16	1.58	0.16	0.17
	PAN5	Eastern wall at Koppiekraal Pan. Sandstone	-26.9311	20.3463	34	836			2.2	0.15	0.16	2.56	0.15	0.15	1.64	0.15	0.17
	PAN4	Eastern wall at Koppiekraal Pan. Sandstone with carbonate freagments	-26.9311	20.3463	37.5	832.5			2.19	0.16	0.17	2.52	0.17	0.16	1.59	0.17	0.17
	PAN1	Eastern wall at Koppiekraal Pan. Minor quartz in carboante matrix	-26.9311	20.3463	39.5	830			2.12	0.18	0.17	2.42	0.18	0.16	1.47	0.18	0.17
									Apparent burial age (Ma) (Ri=5.03-5.15)						Apparent burial age (Ma) (Ri=4.24)
cuttings	GAL3	Valley drilled borehole	-24.3514	19.3375	3	1129	1.78188	0.233016	0.8	0.17	0.15	1.43	0.18	0.15	0.37	0.16	0.15
	GAL6	Valley drilled borehole	-24.3514	19.3375	6	1129	4.63184	2.23001	2.03	0.22	0.19	2.57	0.23	0.18	1.69	0.24	0.18
unconsolidated	AOUB	Longitudinal dune crest	-24.3158	18.4373	0.5	1187	1.20599	0.231288
	NSB	Longitudinal dune slope. 5 m below crest	-24.3661	19.3339	0.2	1145	1.73654	1.94327
	PAN10	Eastern wall at Koppiekraal Pan. Active dune crest	-26.9311	20.3463	0.2	870	1.18178	0.21909
	PAN9	Eastern wall at Koppiekraal Pan. Active dune slope. 8 m below crest	-26.9311	20.3463	0.2	862	1.20293	0.152231
	TSH	Sandsheet	-26.0317	22.4182	0.1	973	1.45027	0.223958
	SAND16	Longitudinal dune swale	-26.7	22.4478	0.1	963	1.62612	0.44762
	SAND17	Longitudinal dune swale	-26.9872	20.7737	0.1	852	1.83641	1.69199
	SAND18	Longitudinal dune crest	-27.0584	20.7784	0.1	881	1.74649	0.478634
	SAND13	Sandsheet	-27.349	22.9908	0.1	1090	1.9086	0.312008
	SAND14	Sandsheet	-26.5572	23.0061	0.1	1100	2.09399	0.465414
	MM1	Drilled borehole in sandsheet	-27.3758	22.9831	1	1090	5.98378	2.12778
	MM3	Drilled borehole in sandsheet	-27.3758	22.9831	3	1090	2.51655	0.752301
		*Burial ages were calculated for overburden density of 2 gr cm-3 excepting PAN7 and PAN8 where a value of 1.7 was assigned

## Sheet: S2 Al & Be data
Sample	Quartz (gr)	9Be carirer added (mg)	10Be/9Be (10-13)	Error	10Be (105 atoms g−1 quartz)	Error	Total Al (1018 atoms g−1 quartz)	26Al/27Al (10-13)	Error	26Al (105 atoms g−1 quartz)	Error
PAN8	20.024	0.2478	6.79465	0.311147	5.61953	0.280808	3.37612	3.98667	0.127086	13.4617	0.688551
PAN7	20.058	0.259	5.80714	0.354528	5.01138	0.321945	3.26085	3.3535	0.114931	10.9371	0.576102
PAN6	20.025	0.2464	5.22249	0.266679	4.29466	0.235521	3.57988	2.36465	0.092943	8.46658	0.4748
PAN5	20.069	0.2506	4.6683	0.205261	3.8958	0.188183	3.49477	2.13819	0.0874492	7.47371	0.427553
PAN4	20.021	0.2464	3.84243	0.150246	3.16041	0.138805	3.28678	1.89579	0.0982153	6.23208	0.407903
PAN1	20.026	0.2534	2.68984	0.111716	2.27469	0.104857	3.19304	1.50815	0.0776301	4.81637	0.313973
GAL3	20.036	0.2618	40.0406	0.700296	16.723	0.505124	0.857741	41.127	1.5431	57.5776	3.26855
GAL6	20.097	0.2534	19.785	0.447842	11.0881	0.348709	1.15949	67.1158	2.7035	21.7049	1.80496
AOUB	20.161	0.2618	13.1582	0.319353	34.7489	0.923228	3.96178	16.832	0.568416	162.963	8.93744
NSB	20.026	0.259	14.8337	0.348719	12.8215	0.395736	3.22925	18.7163	1.36455	54.3638	2.84589
PAN10	20.148	0.2534	15.3021	0.357144	12.862	0.395333	3.37357	14.5116	0.524993	53.8931	2.89921
PAN9	20.094	0.2716	14.2411	0.406907	12.8644	0.448672	3.68146	15.9724	0.574556	53.4329	2.88182
TSH	20.813	0.2492	20.885	0.406729	16.7121	0.466523	2.21295	26.1353	0.768817	65.5633	3.25537
SAND16	20.209	0.245	14.1687	0.492291	11.4798	0.460226	2.58316	16.5662	0.503526	41.725	2.09618
SAND17	20.174	0.2408	13.3983	0.376971	10.688	0.368949	2.52264	17.4319	0.705758	42.4402	2.41543
SAND18	20.251	0.2688	12.5487	0.32744	11.1317	0.365975	2.42497	17.0659	0.54598	38.8206	1.9884
SAND13*	8.79	0.276	10.075	0.258	21.167	0.687	3.39588	22.5	0.078914	76.5	0.8
SAND14*	13.82	0.278	25.186	0.5781	33.827	1.029	3.99724	33.6	0.705083	134.2	3.1
MM1*	20.008	0.247	40.536	0.482	32.1711	0.74846	3.56	19.6	0.507	70.0584	18.3048
MM3*	20.283	0.271	36.959	0.668	31.7294	0.85517	3.95	29.3	0.593	115.599	5.19308
*Data from Matmon et al., 2015

## Sheet: S3 Cosmolian input
	sample	Latitude*	Longtitude*	Elevation (m)*	Density (gr cm-3)	Erosion rates (m Ma-1)	Dune heights/depths (m)	Retention time reservoirs (detailed below)
pre-eolian stage	GAL3	-24.06	18.2	1360	2.65	3, 9, 15, 20
	GAL6	-24.06	18.2	1360	2.65	3, 9, 15, 20
	AOUB	-24.06	18.2	1360	2.65	3, 9, 15, 20
	NSB	-24.06	18.2	1360	2.65	3, 9, 15, 20
	PAN10	-24.54	19	1147	2.65	3, 9, 15, 20
	PAN9	-24.54	19	1147	2.65	3, 9, 15, 20
	TSH	-24.54	19	1147	2.65	3, 9, 15, 20
	SAND16	-24.54	19	1147	2.65	3, 9, 15, 20
	SAND17	-24.54	19	1147	2.65	3, 9, 15, 20
	SAND18	-24.54	19	1147	2.65	3, 9, 15, 20
	SAND13	-24.54	19	1147	2.65	3, 9, 15, 20
	SAND14	-24.54	19	1147	2.65	3, 9, 15, 20
	MM1	-24.54	19	1147	2.65	3, 9, 15, 20
	MM3	-24.54	19	1147	2.65	3, 9, 15, 20
eolian stage	GAL3	-23.45	18.46	1360	1.7		5, 10, 20	SWKH eolian, SWKH eolian adjusted***, SWKH eolian & fluvial
	GAL6	-23.45	18.46	1360	1.7		5, 10, 20	SWKH eolian, SWKH eolian adjusted, SWKH eolian & fluvial
	AOUB	-23.45	18.46	1360	1.7		5, 10, 20	SWKH eolian, SWKH eolian adjusted, SWKH eolian & fluvial
	NSB	-23.45	18.46	1360	1.7		5, 10, 20	SWKH eolian, SWKH eolian adjusted, SWKH eolian & fluvial
	PAN10	-25.24	19.67	1180	1.7		5, 10, 20	SWKH eolian, SWKH eolian adjusted, SWKH eolian & fluvial
	PAN9	-25.24	19.67	1180	1.7		5, 10, 20	SWKH eolian, SWKH eolian adjusted, SWKH eolian & fluvial
	TSH	-24.54	19	1147	1.7		5, 10, 20	SWKH eolian, SWKH eolian adjusted, SWKH eolian & fluvial
	SAND16	-24.54	19	1147	1.7		5, 10, 20	SWKH eolian, SWKH eolian adjusted, SWKH eolian & fluvial
	SAND17	-25.24	19.67	1180	1.7		5, 10, 20	SWKH eolian, SWKH eolian adjusted, SWKH eolian & fluvial
	SAND18	-25.24	19.67	1180	1.7		5, 10, 20	SWKH eolian, SWKH eolian adjusted, SWKH eolian & fluvial
	SAND13	-24.54	19	1147	1.7		5, 10, 20	SWKH eolian, SWKH eolian adjusted, SWKH eolian & fluvial
	SAND14	-24.54	19	1147	1.7		5, 10, 20	SWKH eolian, SWKH eolian adjusted, SWKH eolian & fluvial
	MM1	-24.54	19	1147	1.7		5, 10, 20	SWKH eolian, SWKH eolian adjusted, SWKH eolian & fluvial
	MM3	-24.54	19	1147	1.7		5, 10, 20	SWKH eolian, SWKH eolian adjusted, SWKH eolian & fluvial
		* Average values of the headwaters and catchment areas during pre-eolian stage and eolian stage, respectively
sample	Kal 02/1.1	Kal 02/1.2	Kal 02/1.3	Kal 02/1.4	Kal 02/1.5	Kal 02/1.6	Kal 02/1.7	Kal 02/1.8	Kal 02/1.9	Kal 02/1.10	Kal 02/1.11	Kal 04/6.1	Kal 04/6.2	Kal 04/6.3	Kal 04/6.4	Kal 04/6.5	Kal 04/6.6	Kal 04/6.7	Kal 04/6.8	Kal 02/2.1	Kal 02/2.2	Kal 02/2.3	Kal 02/2.4	Kal 02/7.1	Kal 02/7.2	Kal 02/7.3	Kal 02/7.4	Kal 02/7.5	Kal 02/7.6	Kal 02/7.7	Kal 02/7.8	Kal 02/7.9	Kal 02/7.10	Kal 02/7.11	Kal 02/7.12	Kal 02/7.13	Kal 02/7.14	Kal 04/12.1	Kal 04/12.2	Kal 04/12.3	Kal 04/12.4	Kal 04/12.5	Kal 04/12.6	Kal 04/10.1	Kal 04/10.2	Kal 04/10.3	Kal 04/8.1	Kal 04/8.2	Kal 04/8.3
Depth (m)	0.4	1.05	1.55	2.1	3	4	5	6	6.85	7.45	8.05	3	6.5	7	7.5	8	8.5	9	9.5	1	3	6	8	1.5	2.5	3.5	4.5	5.5	6.5	7.5	8.5	9.5	10.5	11.5	12.5	13.5	14.5	1	2	3	4	5	6	2	3	4	0.5	1	1.5
Age (y)	150	160	3100	4900	9400	10400	10100	9200	10300	12700	57000	12200	12100	12300	52000	55000	76000	76000	77000	340	3600	10200	12500	160	1800	3500	6000	8900	9000	10200	9800	9100	10000	9300	10900	10800	10500	11000	11900	18500	34000	92000	104000	13200	19500	22000	570	1600	2800
SWKH** eolian retention time (y)	75	30.4762	400	466.667	626.667	520	404	306.667	300.73	340.94	1416.15	813.333	372.308	351.429	1386.67	1375	1788.24	1688.89	1621.05	68	240	340	312.5	21.3333	144	200	266.667	323.636	276.923	272	230.588	191.579	190.476	161.739	174.4	160	144.828	2200	1190	1233.33	1700	3680	3466.67	1320	1300	1100	228	320	373.333
**SWKH = Southwest Kalahari
SWKH eolian adujsted retention time (y)	2420	2480	2760	3384.62	3466.67	3661.02	3680	3866.67	4000	4000	4093.33	4125	4763.33	7062.5	8411.76	875	1320	70	1375	640	56
			***For the adjusted dataset the probability of 90% of the shortest durations equals the probabilty of the 10% of the longer durations
sample	2620-1 KALI	2620-1 KAL2	2620-1 KAL3	2620-1 KAL4	2620-1 KAL5	2620-1 ÍCAL6	2620-1 KAL7	2720-2 KAL8	2720-2 KAL9	2720-2 KALIO	Molopo River	Molopo River	Molopo River	Molopo/NossobRiver	Molopo River profile 2702	Molopo River profile 2703	Molopo River profile 2704
Depth (m)	0.5	1.4	2.9	3.1	4.3	5.3	0.9	0.7	0.9	0.55	0.59	1.71	3.2	1.1	0.1	1.1	2
Age (y)	28800	29500	33600	27900	37000	36000	170	8400	1080	420	19574	19832.5	15886.5	18729.5	1080	8400	22939
SWKH eolian & fluvial retention time (y)	11520	4214.29	2317.24	1800	1720.93	1358.49	37.7778	2400	240	152.727	6635.25	2319.59	992.906	3405.36	2160	1527.27	2293.9
					g
[truncated: 95 more columns]

## Sheet: S4 Cosmolian output
Dune height (m)	Retention time reservoirs	Source erosion rate (m Ma-1)	Modeled time until convergence (graphical peak) (myr)	Cconvergence events (%)	Modeled time until convergence (graphical peak) (myr)	Cconvergence events (%)	Modeled time until convergence (graphical peak) (myr)	Cconvergence events (%)	Modeled time until convergence (graphical peak) (myr)	Cconvergence events (%)	Modeled time until convergence (graphical peak) (myr)	Cconvergence events (%)	Modeled time until convergence (graphical peak) (myr)	Cconvergence events (%)	Modeled time until convergence (graphical peak) (myr)	Cconvergence events (%)	Modeled time until convergence (graphical peak) (myr)	Cconvergence events (%)	Modeled time until convergence (graphical peak) (myr)	Cconvergence events (%)	Modeled time until convergence (graphical peak) (myr)	Cconvergence events (%)	Modeled time until convergence (graphical peak) (myr)	Cconvergence events (%)	Modeled time until convergence (graphical peak) (myr)	Cconvergence events (%)	Modeled time until convergence (graphical peak) (myr)	Cconvergence events (%)	Modeled time until convergence (graphical peak) (myr)	Cconvergence events (%)
			GAL3		GAL6		AOUB		NSB		PAN10		PAN9		TSH		SAND16		SAND17		SAND18		SAND13		SAND14		MM1		MM3
5	SWKH eolian dt2	3	1.58	25.93	7.79	3.78	0.84	28.2	9.6	6.33	1.1	10.99	1.13	12.06	1.17	28.2	4.57	14.69	10.36	7.41	4.89	12.45	1.53	37.78	1.5	63.42	5.65	75.45	1.76	55.79
10	SWKH eolian dt2	3	1.39	20.48	3.36	26.12	0.83	21.76	7.19	14.24	1.03	15.7	1.06	16.69	1.11	21.76	1.4	15.83	7.26	13.85	1.5	13.24	1.42	25.78	1.48	40.61	3.82	59.06	1.73	33.55
20	SWKH eolian dt2	3	1.4	17.64	3.3	22.29	0.85	18.46	8.26	9.53	1.02	11.03	1.04	11.75	1.07	18.46	1.36	11.58	8.62	9.41	1.44	10.01	1.46	22.03	1.49	37.51	3.67	56.67	1.72	31.46
5	SWKH eolian	3	1.75	2.2	NaN	NaN	0.94	7.53	NaN	NaN	NaN	0.5	NaN	0.53	1.28	7.53	NaN	0.14	NaN	NaN	NaN	0.03	1.93	21.81	2.15	90.11	9.64	44.6	2.59	83.67
10	SWKH eolian	3	1.45	63.97	3.75	44.1	0.91	68.39	0.97	36.99	0.87	49.84	0.89	52.37	1.15	68.39	1.23	52.98	1.14	39.15	1.34	47.11	1.61	69.28	1.88	62.68	4.8	13.39	2.24	55.97
20	SWKH eolian	3	1.37	43.41	3.08	42.93	0.92	46.23	0.95	30.17	0.83	40.32	0.84	42.01	1.11	46.23	1.13	40.9	1.09	32.09	1.23	35.46	1.56	44.14	1.81	36.9	4.32	7.89	2.13	31.67
5	SWKH eolian & fluvial	3	1.59	21.88	8.64	1.15	0.86	25.63	7.77	2.45	1.07	5.81	1.1	6.78	1.14	25.63	1.58	8.98	4.96	3.13	1.81	7.33	1.58	38.66	1.57	71.9	5.33	74.11	1.84	63.69
10	SWKH eolian & fluvial	3	1.38	26.21	3.32	30.86	0.84	28.72	8.68	18.6	0.99	21.28	1.02	22.58	1.07	28.72	1.35	21.14	4.84	18.12	1.45	18.16	1.44	30.13	1.52	45.81	3.92	52.52	1.76	38.32
20	SWKH eolian & fluvial	3	1.41	21.1	3.25	24.73	0.87	22.35	6.5	10.48	0.98	13.65	1.01	14.6	1.08	22.35	1.32	14.67	6.21	10.63	1.41	12.82	1.45	25.1	1.53	39.61	4.24	47.44	1.76	33.95
5	SWKH eolian dt2	9	1.9	25.85	10.01	3.51	1.13	29.14	1.13	13.05	1.19	17.91	1.23	19.23	1.49	29.14	1.74	17.86	1.41	12.92	1.94	14.53	1.81	36.86	1.8	60.88	6.78	73.66	2.06	53.51
10	SWKH eolian dt2	9	1.7	20.63	3.71	24.99	1.13	22.94	1.12	19.29	1.17	20.43	1.2	21.25	1.39	22.94	1.56	19.59	1.3	18.16	1.67	16.39	1.73	23.54	1.77	37.56	4.2	53.09	2.03	31.14
20	SWKH eolian dt2	9	1.7	17.37	3.7	20.55	1.13	17.78	1.06	14.78	1.11	16.63	1.13	17.36	1.37	17.78	1.5	16.04	1.25	14.47	1.62	13.41	1.74	21.01	1.8	34.28	4.38	51.15	2.06	28.52
5	SWKH eolian	9	2.32	3.23	NaN	NaN	1.62	11.25	1.31	4.59	1.44	5.77	1.44	5.79	1.92	11.25	2.08	1.02	1.57	1.67	NaN	0.34	2.59	22.51	2.81	90.11	11.37	41.9	3.14	84.31
10	SWKH eolian	9	1.92	61.1	8.26	39.79	1.36	64.89	1.12	48.74	1.24	55.02	1.26	57.27	1.59	64.89	1.63	53.72	1.32	46.98	1.74	46.51	2.09	65.02	2.66	57.89	9	11.54	3.26	50.89
20	SWKH eolian	9	1.82	38.25	3.63	35.33	1.37	40.41	1.07	39.76	1.17	41.22	1.19	42.39	1.53	40.41	1.55	37.67	1.25	38.04	1.67	33.12	2.04	37.42	2.4	31.22	5.56	5.86	2.75	25.79
5	SWKH eolian & fluvial	9	1.97	22.4	NaN	1	1.19	26.06	1.19	11.09	1.24	14.7	1.27	15.63	1.51	26.06	1.74	13.18	1.44	9.45	1.96	10.3	1.92	37.87	1.92	70.05	6.46	70.71	2.23	61.73
10	SWKH eolian & fluvial	9	1.71	25.77	3.72	29.23	1.15	27.36	1.1	24.2	1.16	26.32	1.18	27.47	1.39	27.36	1.54	25.18	1.29	23.73	1.66	21.32	1.74	28.83	1.82	44.81	5.11	48.75	2.08	38.01
20	SWKH eolian & fluvial	9	1.72	20.27	3.72	23.4	1.16	21.15	1.03	16.9	1.1	18.42	1.12	19.4	1.38	21.15	1.5	17.81	1.21	16.4	1.63	15.21	1.76	23.53	1.86	35.87	4.77	42.27	2.12	29.7
5	SWKH eolian dt2	15	1.96	25.48	12.45	3.41	1.2	28.42	1.23	14.09	1.29	18.64	1.31	19.5	1.57	28.42	1.77	18.01	1.47	13.32	1.99	15.04	1.9	37.04	1.85	61.67	6.11	71.48	2.14	53.22
10	SWKH eolian dt2	15	1.76	20.36	3.78	23.74	1.18	21.94	1.17	19.36	1.23	21.15	1.25	22.31	1.45	21.94	1.6	19.12	1.37	19	1.71	16.3	1.78	23.31	1.84	37.56	4.45	53.78	2.1	31.13
20	SWKH eolian dt2	15	1.76	16.86	3.72	20.54	1.18	17.7	1.11	15.48	1.18	16.93	1.21	17.72	1.4	17.7	1.57	15.69	1.3	15.29	1.7	12.61	1.81	20.94	1.86	33.97	4.49	49.9	2.1	28.19
5	SWKH eolian	15	2.49	3.08	NaN	NaN	1.71	11.89	1.45	4.83	1.51	6.25	1.58	6.09	2.02	11.89	2.16	1.08	1.78	1.81	NaN	0.28	2.66	22.22	2.93	90.07	10.92	41.35	3.56	84.1
10	SWKH eolian	15	2	60.52	10.25	39.12	1.45	63.9	1.22	49.18	1.33	55.89	1.35	58.15	1.67	63.9	1.73	53.25	1.41	47.69	1.84	46.6	2.25	65.07	2.66	56.56	12.35	11.36	5.29	50.63
20	SWKH eolian	15	1.94	36.69	3.67	34.52	1.46	39.64	1.17	39.06	1.25	40.73	1.27	42.25	1.63	39.64	1.62	37.29	1.34	37.43	1.72	32.63	2.14	36.26	2.51	30.67	6.57	6.03	2.89	25.52
5	SWKH eolian & fluvial	15	2.03	22.38	NaN	0.78	1.28	26.73	1.27	11.32	1.32	15.35	1.34	16.19	1.59	26.73	1.81	13.23	1.52	9.66	2.04	9.88	1.97	36.84	2.02	70.18	7.18	70.29	2.27	62.4
10	SWKH eolian & fluvial	15	1.8	25.09	3.83	28.52	1.23	27.59	1.16	24.83	1.2	25.99	1.23	27.18	1.47	27.59	1.59	24.27	1.34	23.59	1.69	20.26	1.84	29.36	1.9	43.52	4.72	46.54	2.17	35.74
20	SWKH eolian & fluvial	15	1.77	19.1	3.67	21.51	1.22	20.75	1.09	16.62	1.16	18.28	1.18	19.32	1.44	20.75	1.55	17.54	1.28	16.11	1.67	15.2	1.84	22.85	1.92	34.83	4.42	42.56	2.15	29.16
5	SWKH eolian dt2	20	1.99	26.03	11.59	3.25	1.24	29.65	1.24	14.81	1.3	19.13	1.33	20.28	1.55	29.65	1.83	19.33	1.48	13.91	2	16.15	1.92	36.55	1.89	60.63	6.67	70.69	2.16	52.65
10	SWKH eolian dt2	20	1.79	19.75	3.8	23.89	1.2	21.6	1.19	19.37	1.25	20.65	1.27	21.64	1.47	21.6	1.65	19.03	1.4	18.32	1.75	16.37	1.81	23.69	1.87	36.96	4.78	53.94	2.12	30.43
20	SWKH eolian dt2	20	1.79	17.05	3.69	19.76	1.2	18.57	1.13	14.08	1.19	15.51	1.2	16.16	1.46	18.57	1.59	14.91	1.31	13.58	1.7	12.93	1.81	20.32	1.83	34.02	4.78	50.49	2.09	28.91
5	SWKH eolian	20	2.55	3.02	NaN	NaN	1.76	11.54	1.42	4.93	1.51	6.61	1.52	6.49	2.04	11.54	2.11	1.05	1.72	1.66	NaN	0.41	2.72	22.79	3.01	89.82	11.59	40.69	3.59	83.62
10	SWKH eolian	20	2.05	60.24	8.69	38.28	1.5	63.95	1.25	48.57	1.33	54.28	1.35	56.12	1.67	63.95	1.74	52.41	1.43	45.85	1.87	45.58	2.36	65.23	2.71	57.12	10.53	11.9	3.23	49.96
20	SWKH eolian	20	1.98	36	3.84	34.02	1.48	40.18	1.19	38.95	1.29	40.81	1.31	42.25	1.67	40.18	1.67	37.96	1.36	37.05	1.77	32.58	2.26	35.78	2.64	29.57	6.11	6.06	2.91	24.5
5	SWKH eolian & fluvial	20	2.05	22.43	7.68	1.14	1.28	26.35	1.29	12.41	1.35	15.37	1.38	16.13	1.59	26.35	1.89	13.89	1.53	10.02	2.13	11.17	2.01	38.29	2.03	69.96	7.27	68.66	2.34	62.42
10	SWKH eolian & fluvial	20	1.81	24.86	3.8	29.04	1.24	27.53	1.17	23.93	1.24	25.77	1.26	27.09	1.48	27.53	1.6	24.55	1.37	23.35	1.72	21.43	1.84	28.82	1.96	42.92	4.75	45.81	2.21	35.48
20	SWKH eolian & fluvial	20	1.8	19.4	3.64	22.16	1.26	21.08	1.11	16.8	1.2	18.31	1.22	19.27	1.47	21.08	1.61	17.43	1.3	16.07	1.74	14.79	1.86	23.01	1.95	34.89	5.54	41.38	2.2	29.17
